# Supplementary material for: The Inborn Errors of Immunity—Virtual Consultation System Platform in Service for the Italian Primary Immunodeficiency Network: Results from the Validation Phase
Source: Springer Nature journal article supplement (doi:10.1007/s10875-023-01644-y), 2024-01-17
Supplement: MOESM1 [file 10875_2023_1644_MOESM1_ESM.pdf]

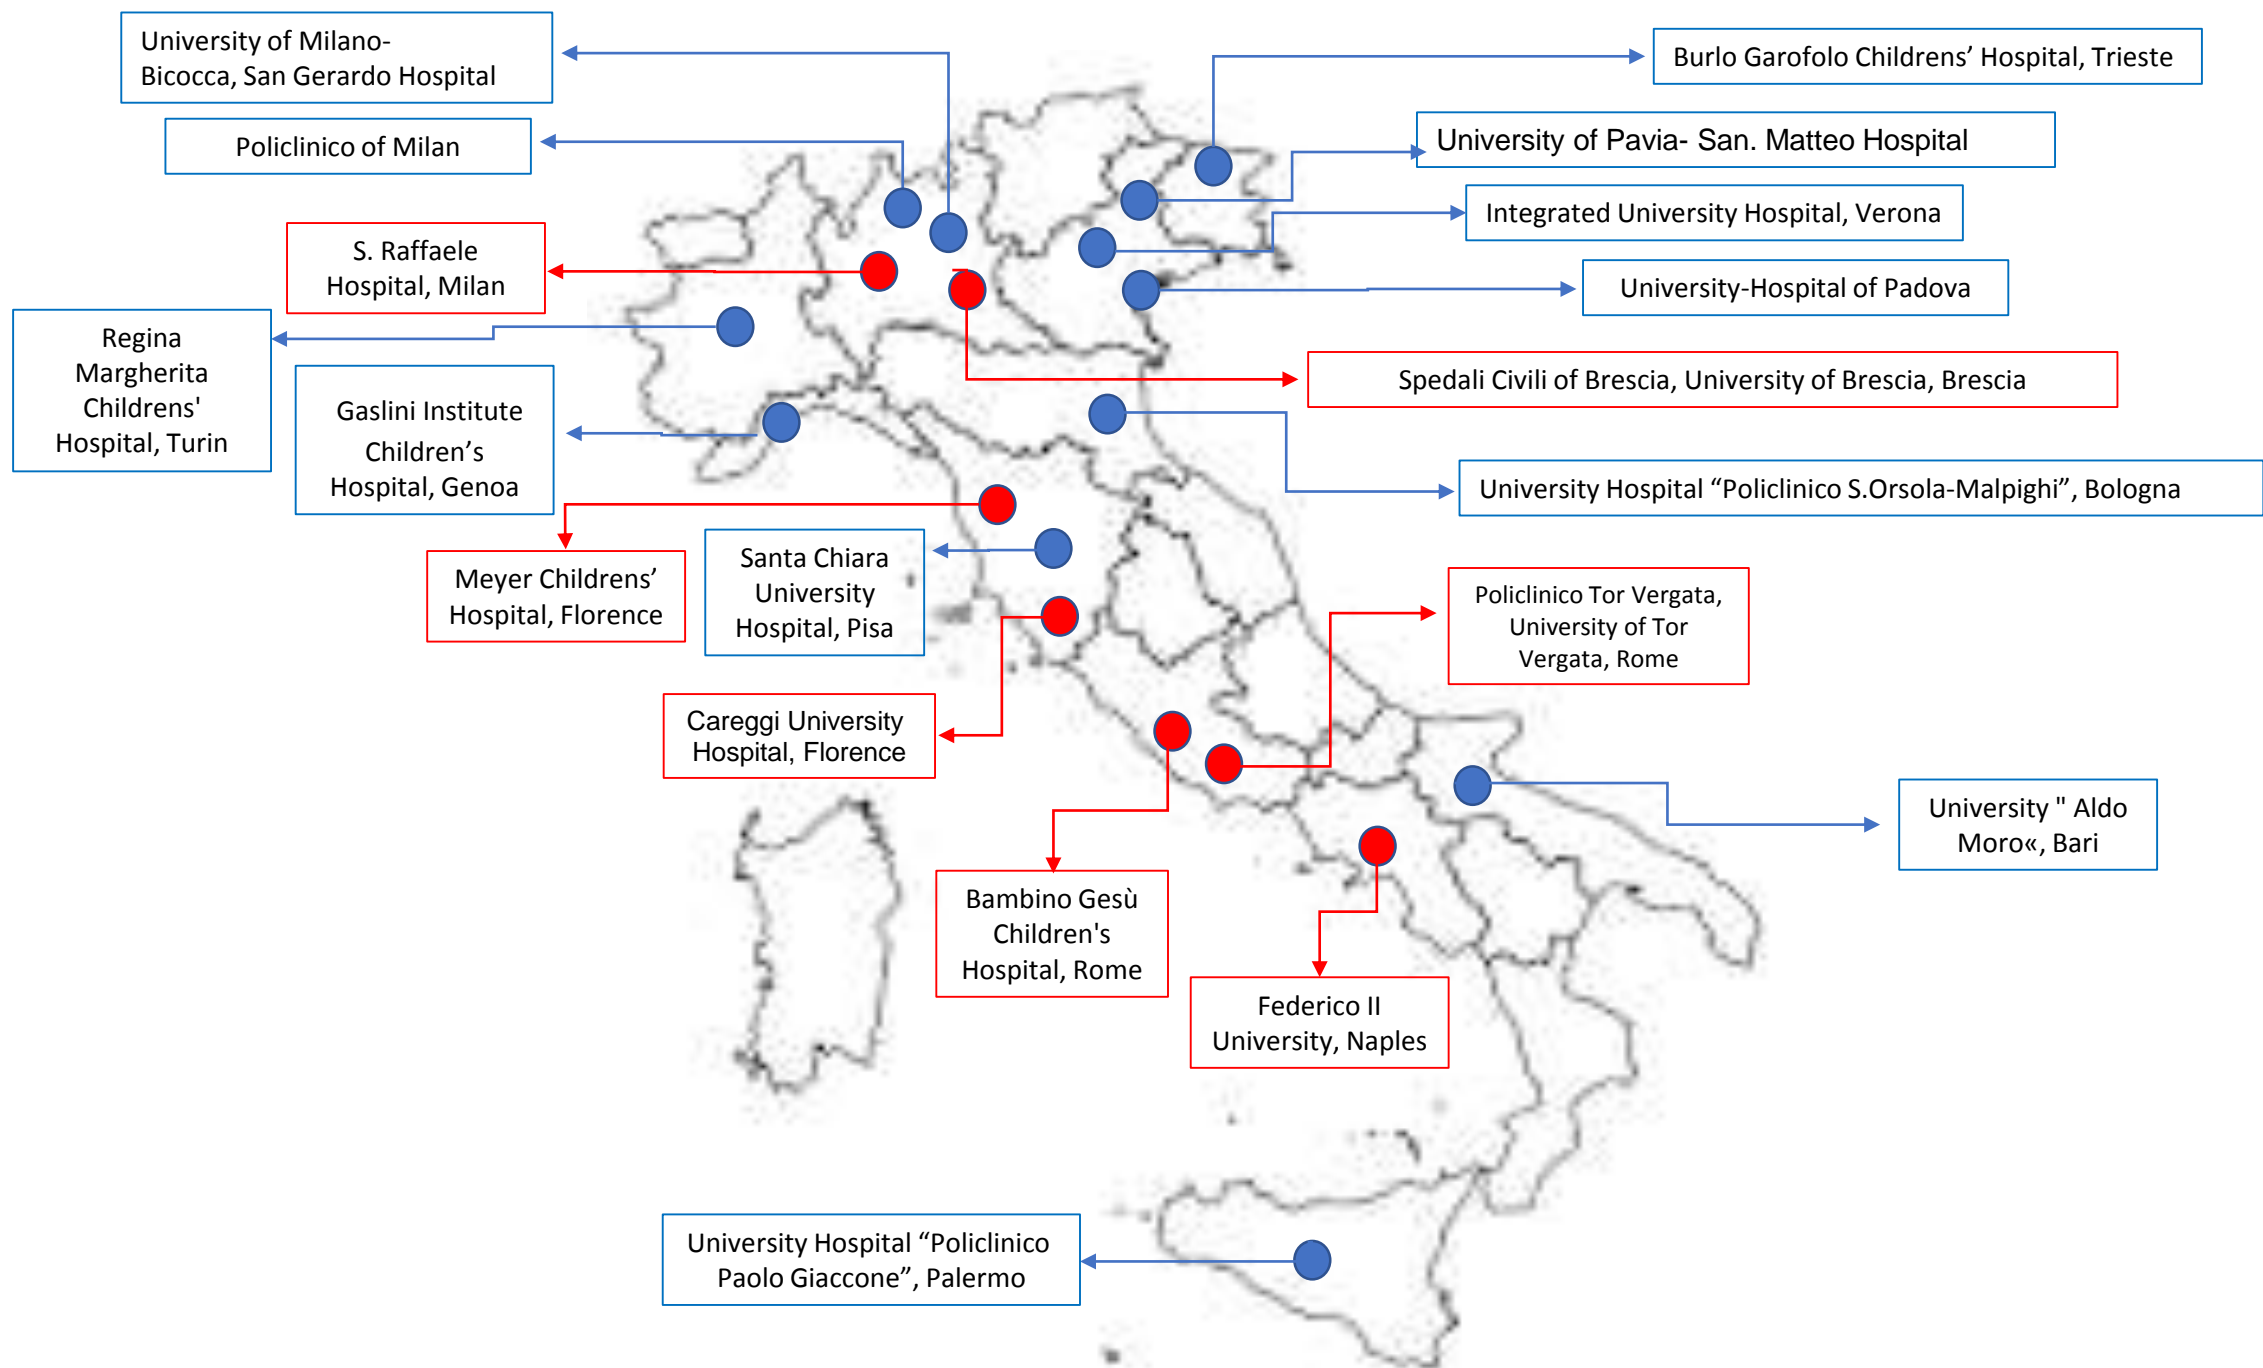

**Legend:** IPINet immunological experts ● ≤ 2 ● > 3
